# Supplementary material for: Over-Expression of βII-Tubulin and Especially Its Localization in Cell Nuclei Correlates with Poorer Outcomes in Colorectal Cancer
Source: PubMed Central journal article supplement (PMC6357106; doi:10.3390/cells8010025), 2019-01-07
Supplement: cells-08-00025-s001.pdf [file cells-08-00025-s001.pdf]

**Table S1.** Clinical data about the patients

| <b>Feature</b>                                                            | <b>n</b> | <b>%</b> |
|---------------------------------------------------------------------------|----------|----------|
| Age at the moment of the operation                                        |          |          |
| ≥ 70                                                                      | 46       | 37.1     |
| < 70                                                                      | 78       | 62.9     |
| <i>All</i>                                                                | 124      | 100.0    |
| Gender                                                                    |          |          |
| Female                                                                    | 69       | 55.6     |
| Male                                                                      | 55       | 44.4     |
| <i>All</i>                                                                | 124      | 100.0    |
| Synchronous distance metastases                                           |          |          |
| No                                                                        | 103      | 83.1     |
| Yes                                                                       | 21       | 16.9     |
| <i>All</i>                                                                | 124      | 100.0    |
| Clinical stage                                                            |          |          |
| I                                                                         | 14       | 11.3     |
| II                                                                        | 41       | 33.1     |
| III                                                                       | 50       | 40.3     |
| IV                                                                        | 19       | 15.3     |
| <i>All</i>                                                                | 124      | 100.0    |
| Neoadjuvant radiotherapy of cancers of the rectum                         |          |          |
| No                                                                        | 20       | 60.6     |
| Yes                                                                       | 13       | 39.4     |
| <i>All</i>                                                                | 33       | 100.0    |
| Adjuvant 5-FU chemotherapy in patients with clinical stage II-IV          |          |          |
| No                                                                        | 59       | 53.6     |
| Yes                                                                       | 51       | 46.4     |
| <i>All</i>                                                                | 110      | 100.0    |
| Progression after 3,56 years (q <sub>1</sub> -q <sub>3</sub> 1,24 – 4,36) |          |          |
| No progression                                                            | 78       | 62.9     |
| Metachronous metastases                                                   | 36       | 29.1     |
| Peritoneal carcinomatosis                                                 | 4        | 3.2      |
| Regional recurrence                                                       | 6        | 4.8      |
| <i>All</i>                                                                | 124      | 100.0    |
| Outcome after 3,56 (q <sub>1</sub> -q <sub>3</sub> 1,24 – 4,36)           |          |          |
| Alive                                                                     | 81       | 65.3     |
| Dead                                                                      | 43       | 34.7     |
| <i>All</i>                                                                | 124      | 100.0    |

**Table S2.** Features of the tumors

| <b>Feature</b>                   | <b>n</b>   | <b>%</b>     |
|----------------------------------|------------|--------------|
| Bowel segment                    |            |              |
| cecum                            | 18         | 14.4         |
| ascending colon                  | 11         | 8.8          |
| transverse colon                 | 3          | 2.4          |
| splenic flexure                  | 3          | 2.4          |
| descending colon                 | 7          | 5.6          |
| sigmoid colon                    | 22         | 17.6         |
| rectosigmoid junction            | 28         | 22.4         |
| rectum                           | 33         | 26.4         |
| <i>All</i>                       | <i>125</i> | <i>100.0</i> |
| Localization                     |            |              |
| left (cecum – transverse colon)  | 93         | 74.4         |
| right (splenic flexure – rectum) | 32         | 25.6         |
| <i>All</i>                       | <i>125</i> | <i>100.0</i> |
| pT category                      |            |              |
| 1                                | 3          | 2.4          |
| 2                                | 12         | 9.6          |
| 3                                | 80         | 64.0         |
| 4a                               | 22         | 17.6         |
| 4b                               | 8          | 6.4          |
| <i>All</i>                       | <i>125</i> | <i>100.0</i> |
| pN category                      |            |              |
| 0                                | 59         | 47.2         |
| 1a                               | 14         | 11.2         |
| 1b                               | 15         | 12.0         |
| 2a                               | 12         | 9.6          |
| 2b                               | 25         | 20.0         |
| <i>All</i>                       | <i>125</i> | <i>100.0</i> |
| pM category                      |            |              |
| 0                                | 104        | 83.2         |
| 1a                               | 12         | 9.6          |
| 1b                               | 9          | 7.2          |
| <i>All</i>                       | <i>125</i> | <i>100.0</i> |
